1 **Title**

2 **Following the evolution of *Homo sapiens* across Africa using a**  
3 **uniparental genetic guide.**

4

5

6 **Author**

7 **Vicente M. Cabrera<sup>1</sup>**

8

9 **Affiliation**

10 **Departamento de genética, Universidad de La Laguna, Tenerife, Islas**  
11 **Canarias, Spain.**

12

13 **Corresponding Author (VMC)**

14 [Vicente.vca811@gmail.com](mailto:Vicente.vca811@gmail.com)

15 <sup>1</sup> Retired

16

17

18

19

20

## 21 **Abstract**

22 The origin and evolution of modern humans in Africa has reached a  
23 multidisciplinary consensus but the age and regions where it originated  
24 and evolved are current topics of discussion. In this study I put forward an  
25 integrative model guided by the phylogeny and phylogeography of  
26 mitochondrial DNA (and Y-chromosome) haplogroups. I propose an early  
27 origin of modern humans in northwest Africa in a temporal window of  
28 257-345 thousand years ago. A first population split in central Africa  
29 around 175-288 thousand years ago. A subsequent northward spread with  
30 additional population subdivisions during a long statistical interval that  
31 culminated in a first successful out of Africa migration around 130  
32 thousand years ago. A population constriction in southwest Asia  
33 motivated an early return to Africa between 79 and 107 thousand years  
34 ago. This ample Eurasian-ebb to Africa, detected by mitochondrial  
35 haplogroup L3 and Y-chromosome haplogroup E preceded other later and  
36 geographically more limited Eurasian backflows. The archaeological and  
37 fossil finds that could be coetaneous to this molecular journey have been  
38 integrated into this interdisciplinary model.

## 39 **Introduction**

40 Hypotheses about human evolution, formulated from archaeological and  
41 genetics data, are mainly based on radiometric dating for the former and  
42 on molecular dating for the latter [1]. These methods have the advantage  
43 of locating important evolutionary events in specific places and time  
44 frames where these events must have occurred. However, in many cases,  
45 the frameworks established by different disciplines conflict. For example,  
46 applying the molecular clock to mitochondrial DNA (mtDNA) genetic  
47 variation, it has been established that modern humans had a genetic  
48 African origin around 200 thousand years ago (kya) [2], and that a more  
49 evolved form of that lineage left Africa colonizing Eurasia around 60 kya  
50 [3]. However, Middle Stone Age (MSA) artefacts and fossils dated at the  
51 site of Jebel Irhoud, Morocco placed the *Homo sapiens* emergence in  
52 northwest Africa around 300 kya [4,5], and roughly at the same time MSA  
53 tool assemblages replaced more primitive Acheulean tools in southern

54 Kenya [6,7]. Furthermore, fossils from Misliya Cave, Israel, dated around  
55 180 kya [8], and in southern China dated around 100 kya [9], strongly  
56 suggest that members of the *H. sapiens* clade left Africa earlier than  
57 previously thought. It could be adduced that because mtDNA is a single  
58 inherited female locus, its chronology might be discordant with those  
59 obtained from whole nuclear genome analysis. However, with few  
60 exceptions [10], the human demographic history deduced from genomic  
61 studies highly resembles the one based on uniparental markers [11,12].  
62 Therefore, the most prevalent opinion from the population genetics field  
63 is that demographic human expansions from Africa to the Middle East and  
64 beyond, prior to approximately 60 Kya, were ephemeral dispersals that  
65 did not contributed to the modern human gene pool [13]. However, the  
66 genetic chronological framework is based on an insecure evolutionary  
67 rate, which in turn depends on the germline mutation rate, selective  
68 constrains, and the fluctuation of the effective population size due to  
69 demographic processes [14]. Certainly, new technological progresses in  
70 DNA sequencing have highly refined the human germline mutation rate  
71 both at the whole genome [15] and the mtDNA levels [16,17]. In addition,  
72 purifying selection has been taken into account to improve evolutionary  
73 rate estimations [18], but it seems that a time-dependence effect on this  
74 rate [19,20], most probably due to fluctuations in population size [14], is  
75 the main factor responsible of the changes detected in the evolutionary  
76 rate values observed. Recently, a simple algorithm has been proposed to  
77 counterbalance these effects on the mtDNA genome, which practically  
78 doubles the coalescent time estimations along the human mtDNA  
79 phylogenetic tree [21]. In this way, the most determinant archaeological  
80 findings related to the human evolution coherently fit into the molecular  
81 chronology [21].

82 In this paper, using that algorithm, with an appropriate germline mutation  
83 rate, and the successive coalescent events across the human mtDNA  
84 phylogeny as a molecular guide, I describe the progressive evolution of  
85 modern humans into Africa using an integrative model that incorporates  
86 the main archaeological and genetic evolutionary discoveries into a  
87 coherent picture.

## 88 **Material and methods**

89 **Material:** For the phylogenetic and phylogeographic analyses I searched  
90 for mtDNA complete genomes at the NCBI GenBank  
91 ([www.ncbi.nlm.nih.gov/genbank/](http://www.ncbi.nlm.nih.gov/genbank/)), and MITOMAP  
92 ([www.mitomap.org/MITOMAP](http://www.mitomap.org/MITOMAP)) databases, choosing representatives of all  
93 African haplogroups and their main subgroups. Sequences were classified  
94 according to the PhyloTree v.17 (<http://www.phylotree.org>) [22]. In total I  
95 analysed 1,010 mitogenomes (243 for L0, 140 for L1, 73 for L5, 210 for L2,  
96 8 for L6, 32 for L4, and 304 for L3). GenBank accession numbers for these  
97 sequences, their haplogroup classification, and their country/ethnic  
98 affiliation are detailed in supplementary (S) Table 1. A phylogenetic tree  
99 showing the major mtDNA haplogroups relationships is presented as  
100 supplementary(S) Fig 1. Phylogeographic trees for haplogroups L2, L6 and  
101 L4 are presented in SFig 2, 3, and 4 respectively. The phylogeography of  
102 haplogroups L0, L1, L5, and L3 have been studied previously [23].

103 **Methods:** Phylogenetic trees were built using median-joining networks  
104 [24]. To calculate coalescent absolute ages of the main haplogroups I used  
105 a mutation rate of  $1.6 \times 10^{-8}$  per site per year (assuming a mtDNA genomic  
106 length of 16,500 base pairs) that is the mean of two independent  
107 empirical estimates [16,17], and applied a composite rho algorithm that  
108 takes into account time-dependence effects on this mutation rate [21].  
109 The procedure for obtaining coalescent ages for the main haplogroups L0,  
110 L1, L5, L2, L6, L4, and L3 are detailed in STables 2, 3, 4, 5, 6, 7, and 8  
111 respectively. For relative age comparisons of phylogeographically  
112 representative subclades, I calculated their coalescent age using the rho  
113 statistic [25] and a mutation rate for the complete mtDNA sequence of  
114 one substitution in every 3,624 years, correcting for purifying selection  
115 [18], but using those sequences with the largest number of mutations  
116 within each clade. The reason of this is that the effects of both selection  
117 (mainly purifying selection) and genetic drift tend to eliminate those  
118 sequences that in a Poisson distribution, with very low mean of success,  
119 have a greater number of mutations and conserve those included in the  
120 largest classes that have zero or very few mutations [14].

## 121 Results

122 **The genus *Homo* from a genetic perspective:** *Homo* is a genus  
123 represented by only a single extant species (modern humans) and several  
124 extinct specimens [26], which appeared during an interval of just over two  
125 million years. The first hominin species with worldwide spread, most  
126 probably as result of consecutive waves of expansion [27], was *Homo*  
127 *erectus s.l.* Remains of this species have been unearthed in Africa [28], the  
128 Middle East [29], the Caucasus [30], China [31] and Indonesia [32]. As a  
129 generalist species, *H. erectus* reached this wide geographic range with  
130 migrant groups adapting to different ecological niches in isolation. In time,  
131 these groups accumulated distinguishable morphological differences that  
132 some anthropologists have raised to the rank of different species [33], but  
133 speciation seems to be a lengthy process. Thus, molecular phylogenetic  
134 studies have found a long and consistent mean time to speciation in  
135 eukaryotes of around 2 million years (Myr) [34]. In fact, under climatic and  
136 demographic pressures these groups came into secondary contact several  
137 times. In some of these cases, recent ancient DNA (aDNA) studies have  
138 confirmed that, after separations of several hundred years, archaic groups  
139 as Neanderthals, Denisovans or Sima de los Huesos specimens hybridized  
140 frequently confirming the existence of incomplete sexual barriers among  
141 them[35–38]. The heads of these secondary encounters may be the  
142 exchange of genetic variation which greatly possibilities adaptation and  
143 avoids extinction. However, the tail of generalist species groups is that  
144 when coming into contact they have to compete for the same resources,  
145 so that the more adapted displace and outcompete the others with some  
146 genetic assimilation during this process [39]. Ultimately, the rate of  
147 assimilation or displacement depends on the amount of resources  
148 available. Thus, there is archaeological evidence that Neanderthals  
149 displaced less evolved erectus groups across Europe and archaic humans  
150 in the Middle East [40]; that in turn, modern humans displaced less  
151 adapted erectus groups in East and Southeast Asia [41], and Neanderthals  
152 in Europe [42,43]. Furthermore, again aDNA studies have demonstrated  
153 the extinction of several Neanderthal[44] and modern human populations  
154 [45,46] along its recent evolutionary history. From the above

155 considerations I will consider all the groups described in this paper as sub-  
 156 specific stages of a temporally evolving polytypic species.

157 **The northern African origin of the ancestor of modern humans and**  
 158 **Neanderthals:** Based on the topologies obtained from non-recombinant  
 159 uniparental markers (Green et al. 2008; Mendez et al. 2016; Meyer et al.  
 160 2012, 2014; Petr et al. 2020)[35,36,47–49], I have proposed recently that  
 161 modern humans and Neanderthals were sister clades [50], and that the  
 162 topologies obtained using autosomal markers [37,48,51], which consider  
 163 *Homo sapiens* as an outgroup of the sister pair Neanderthal-Denisovan  
 164 were due to secondary introgression. Furthermore, I also posit that the  
 165 ancestor of modern humans and Neanderthals originated in northern  
 166 Africa, and that pre-Neanderthal groups crossed to Europe whereas the  
 167 ancestors of modern humans remained in northern Africa, so that both  
 168 groups evolved in allopatry [50].

169 **The northwest African origin of early anatomically modern humans:**  
 170 Human fossil remains and Middle Stone Age (MSA) archaeological  
 171 artefacts from Jebel Irhoud, Morocco, dated at  $315 \pm 34$  thousand years  
 172 ago (Kya) have situated the earliest phase of modern human evolution in  
 173 northwest Africa [4,5]. Applying a variable evolutionary rate dependent of  
 174 temporal fluctuations in population size to the mtDNA genome, a  
 175 coalescent age for the most recent common ancestor of all extant mtDNA  
 176 lineages was estimated around 300 kya [14,21] which has been replicated  
 177 in this study (Table 1).

178

| Branches        | Mean (Kya) | 95% C.I. (Kya) | Mutation rate           | Study              |  |  |  |  |  |  |
|-----------------|------------|----------------|-------------------------|--------------------|--|--|--|--|--|--|
| L0/L1'2'5'6'4'3 | 192        | 152 - 234      | $1.67 \times 10^{-8}$   | Soares et al. 2009 |  |  |  |  |  |  |
| L0/L1'2'5'6'4'3 | 157        | 120 - 197      | $1.92 \times 10^{-8}$   | Fu et al. 2013     |  |  |  |  |  |  |
| L0/L1'2'5'6'4'3 | 318        | 282 - 354      | $1.3 \times 10^{-8}$ to | Cabrera            |  |  |  |  |  |  |

|                     |     |           |                                                 |                 |  |  |  |  |  |  |
|---------------------|-----|-----------|-------------------------------------------------|-----------------|--|--|--|--|--|--|
| 6'4'3               |     |           | $0.8 \times 10^{-8}$                            | 2020            |  |  |  |  |  |  |
| L0/L1'2'5'<br>6'4'3 | 312 | 277 - 347 | $4.3 \times 10^{-8}$ to<br>$1.9 \times 10^{-8}$ | Cabrera<br>2021 |  |  |  |  |  |  |
| L0                  | 320 | 284 - 356 | $1.6 \times 10^{-8}$ to<br>$0.8 \times 10^{-8}$ | This study      |  |  |  |  |  |  |
| L0                  | 260 | 228 - 293 | $1.6 \times 10^{-8}$ to<br>$1.9 \times 10^{-8}$ | This study      |  |  |  |  |  |  |
| L1                  | 333 | 296 - 369 | $1.6 \times 10^{-8}$ to<br>$0.8 \times 10^{-8}$ | This study      |  |  |  |  |  |  |
| L1                  | 256 | 223 - 289 | $1.6 \times 10^{-8}$ to<br>$1.9 \times 10^{-8}$ | This study      |  |  |  |  |  |  |
| L5                  | 386 | 346 - 425 | $1.6 \times 10^{-8}$ to<br>$0.8 \times 10^{-8}$ | This study      |  |  |  |  |  |  |
| L5                  | 298 | 263 - 335 | $1.6 \times 10^{-8}$ to<br>$1.9 \times 10^{-8}$ | This study      |  |  |  |  |  |  |
| L2                  | 332 | 295 - 368 | $1.6 \times 10^{-8}$ to<br>$0.8 \times 10^{-8}$ | This study      |  |  |  |  |  |  |
| L2                  | 223 | 192 - 253 | $1.6 \times 10^{-8}$ to<br>$1.9 \times 10^{-8}$ | This study      |  |  |  |  |  |  |
| Mean<br>branches    | 301 | 257 - 345 |                                                 | This study      |  |  |  |  |  |  |

179

180 This mtDNA coalescence matches the archaeological and fossil estimates  
181 in Morocco but there is a lack of specific mtDNA lineages in this area to  
182 directly support a northwest African origin. However we have indirect  
183 evidence of the existence of an old genetic component in the Maghreb.  
184 Thus, Late Pleistocene northern African remains derived one-third of their  
185 genomic ancestry from a complex sub-Saharan African gene pool [52].  
186 Curiously, this component was not detected in subsequent Neolithic  
187 periods [53]. On the other hand, it is interesting to point out that,  
188 although most of the Y-chromosome lineages in Morocco (J-M267; E-M81)  
189 are of recent implantation [54], one of the most ancient lineages of the Y-  
190 Chromosome, A0a1 (xP114) has been detected in Moroccan Berbers [55].  
191 Accepting the northwest African origin hypothesis implies that other  
192 contemporaneous hominin lineages as the Broken Hill (Zambia) skull  
193 dated to  $299 \pm 25$  kya [56], or the Kenyan Guomde calvarium dated to

194 around 270 kya [57] possibly did not directly contribute to the origin of  
 195 our species.

196 **The west central African southern African mtDNA bifurcation:** The next  
 197 phylogenetic step in the human mtDNA evolution was the split of the  
 198 earliest L0 lineages from the L1'2'5'6'4'3 ancestor that seems to have  
 199 occurred somewhere in central Africa around 230 kya (Table 2).

| Haplogroup | Lineages | Mutations | mean Age (years) | 95% C.I. (years)  |
|------------|----------|-----------|------------------|-------------------|
| L0         | 291      | 952       | 231,263          | 174,578 - 287,948 |
| L1         | 130      | 483       | 230,892          | 142,562 - 319,222 |
| L5         | 73       | 240       | 235,072          | 157,948 - 312,196 |
| L2         | 201      | 593       | 143,505          | 110,785 - 176,225 |
| L3'4'6     | 329      | 1,172     | 185,017          | 105,878 - 264,157 |
| L6         | 4        | 26        | 35,992           | 17,235 - 54,750   |
| L3'4       | 333      | 1,151     | 130,838          | 87,634 - 184,042  |
| L4         | 26       | 194       | 122,872          | 94,828 - 150,196  |
| L3         | 291      | 952       | 93,348           | 79,476 - 107,220  |

200

201 Subsequent subdivisions of L0 probably happened around the Zambezi  
 202 river approximately 200 kya (Table 3)[58], whereas the L1 and L5  
 203 bifurcations occurred nearly at the same time in central Africa (Table 2).

| Haplogroups | Sequences | mean mutations | 95% C.I. | Coalescent (years) | Geographic origin |
|-------------|-----------|----------------|----------|--------------------|-------------------|
|-------------|-----------|----------------|----------|--------------------|-------------------|



|           |    |       |                  |         |                    |  |
|-----------|----|-------|------------------|---------|--------------------|--|
| L0a       | 5  | 45.00 | 43.73 -<br>47.07 | 164,757 | East Africa        |  |
| L0f       | 4  | 55.00 | 52.75 -<br>57.25 | 199,595 | East Africa        |  |
| L0k       | 4  | 53.50 | 52.58 -<br>54.42 | 194,152 | South Africa       |  |
| L0d       | 5  | 53.00 | 51.48 -<br>54.52 | 192,337 | South Africa       |  |
| L1b       | 5  | 35.00 | 34.12 -<br>35.88 | 127,015 | Northern<br>Africa |  |
| L1c       | 5  | 55.00 | 52.37 -<br>57.63 | 199,595 | Central<br>Africa  |  |
| L5        | 5  | 51.40 | 47.42 -<br>55.38 | 186,531 | East Africa        |  |
| L2a       | 5  | 29.40 | 27.98 -<br>30.82 | 106,693 | Central<br>Africa  |  |
| L2b       | 5  | 41.00 | 38.85 -<br>43.15 | 148,789 | African            |  |
| L6        | 5  | 16.60 | 15.49 -<br>17.71 | 60,241  | East Africa        |  |
| L4a       | 5  | 32.60 | 30.72 -<br>34.48 | 118,305 | East Africa        |  |
| L4b       | 5  | 36.00 | 32.71 -<br>39.29 | 130,644 | African            |  |
| L3a       | 3  | 19.67 | 18.23 -<br>21.10 | 71,382  | East Africa        |  |
| L3b'f     | 10 | 21.60 | 20.12 -<br>23.30 | 78,386  | East Africa        |  |
| L3b       | 5  | 20.60 | 19.92 -<br>21.28 | 74,757  | Central<br>Africa  |  |
| L3f       | 5  | 22.60 | 21.92 -<br>23.28 | 82,015  | East Africa        |  |
| L3c'd     | 6  | 21.50 | 20.50 -<br>23.10 | 78,023  | East Africa        |  |
| L3c       | 1  | 21.00 | -                | 76,209  | East Africa        |  |
| L3d       | 5  | 21.60 | 20.49 -<br>22.71 | 78,386  | Central<br>Africa  |  |
| L3e'i'k'x | 14 | 19.36 | 17.02 -<br>21.7  | 70,257  | East Africa        |  |
| L3e       | 5  | 21.20 | 19.58 -          | 76,935  | Central -          |  |

|     |   |       |                  |         |             |  |
|-----|---|-------|------------------|---------|-------------|--|
|     |   |       | 22.82            |         | West Africa |  |
| L3h | 4 | 33.50 | 28.18 -<br>39.32 | 121,572 | East Africa |  |

204

205 Although L0, mainly the L0d'k clade, is considered a signature of the  
206 Khoe-San people [59], not all L0 branches remained in Southern Africa.  
207 Some of them as L0a and L0f had an early implantation in central and  
208 eastern Africa. Likewise, although L1c is representative of the western  
209 pygmy populations of central Africa, and L0a and L5 of the eastern ones  
210 [60], subsequent ramifications extended further to eastern Africa and  
211 beyond. Similarly, the two deepest Y-chromosome lineages, haplogroups  
212 A and B, branched out in these areas with some A lineages that seem  
213 autochthonous of central African pygmies as A1-P305, other of southern  
214 African Khoisan as A1b1a-M14, and other present in both areas as A1b1b-  
215 M32 [61–63]. The case of haplogroup B is similar, in fact Y-Hg B is a  
216 primary branch of the complex Y-Hg A [64], its deepest lineages in the B2-  
217 M182 clade are prevalent in western and central African pygmies,  
218 whereas other more derived branches as B2b1-P6 and B2b4-P8 are  
219 restricted to southern African Khoisan or to eastern Africans as B2b2  
220 M169 [61–63]. Although subsequent expansions extended the geographic  
221 range of Y haplogroups A and B it seems that was in central Africa where  
222 both lineages originated [65].

223 The deep segregation of the ancestors of southern African populations  
224 from the rest was confirmed in a study of southern African ancient  
225 genomes in which the modern human divergence was estimated to 260 to  
226 350 kya [66]. Furthermore, it was observed that differences between  
227 Khoisan genomes were greater than those between geographically very  
228 distant Eurasian genomes [67]. However, there is genomic evidence of  
229 secondary contacts among extant populations of Khoisan, rainforest  
230 pygmies, and click speakers Hadza and Sandawe from Tanzania which  
231 diverged by 100 – 120 kya [58,68]. In a similar vein, an ancient genomic  
232 divergence between the ancestors of the rainforest pygmies and West  
233 African Yoruba farmers was estimated to 90 – 150 Kya [69]. On the other  
234 hand, ancient DNA studies of a 2,330 years old South African skeleton

235 observed the extinction of some L0d mtDNA lineages even in recent times  
236 confirming an evolution-extinction process in these populations [70].

237 In apparent contradiction with the mtDNA phylogeny, some genome  
238 based studies proposed that the deepest splitting branch in modern  
239 Africans leads to central African pygmies instead of southern African  
240 Khoisan [71], In my opinion, under a neutral view, this discrepancy can be  
241 explained as due to the non-recombining nature of the maternal lineages.  
242 Autosomal phylogenies are based on differences in genetic diversity, but  
243 in mtDNA, in addition, it is also based on the relative age of the mutations  
244 accumulated in the no recombining mtDNA genome. Due to this, although  
245 the central African pygmy L1c lineages show a mean number of mutations  
246 similar to, or greater than, the Khoisan L0 lineages (Table 3). The mtDNA  
247 phylogeny clearly shows that L0 is the deepest branch of the human tree  
248 (Sfig 1), and that the relative accumulation of mutations in the different  
249 lineages is, most probably, a result of their different demographic  
250 processes [14]. The surprising find that central African pygmies have  
251 reduced chromosome X to autosome diversity ratios relative to all other  
252 sub-Saharan Africans has also been explained by demography [12]. Thus,  
253 genetic age estimations situated the ancestor of modern humans in  
254 Central-Southern Africa in a temporal window contemporary with the  
255 Sangoan/Lupemban lithic technologies [72,73] and hominin specimens as  
256 Kabwe [56], Florisbad [74] or *Homo naledi* [75]. However, this  
257 phylogenetic jump from northwestern to central Africa leaves a  
258 geographic gap that is covered by western Africa. Regrettably, although its  
259 archaeological record is still scarce, western Africa seems to be a region of  
260 delayed and stagnant hominin evolution. Putative Oldowan, Acheulean,  
261 Sangoan and other Middle Stone Age incipient industries are sensibly  
262 more recent in West Africa[76–78] than their counterparts in eastern and  
263 central-southern Africa[7,79]. Likewise, the scarce hominin fossils remains  
264 unearthed show primitive features even at recent Pleistocene to  
265 Holocene boundaries as is the case of the Nigerian Iwo Eleru remains,  
266 reflecting either admixture with archaic humans or long-term survival of  
267 primitive anatomical features at recent (11.7 -16.3 Ka) times[80,81]. On its  
268 hand, mtDNA does not present any deep split that could be specifically  
269 related to West Africa (Table 3). Nevertheless, the deepest Y-chromosome

270 branch (Hg A00) with a coalescent age around 300 kya has been detected  
271 only in present day Cameroon populations, with particular prevalence  
272 among Mbo (6.3%) and Bangwa (40.3%) groups [82]. Furthermore, this  
273 basal lineage has been found in Late Pleistocene / Holocene forager  
274 remains from Shum Laka also in Cameroon [71]. It has been suggested  
275 that the presence of Hg A00 in modern humans could be the result of  
276 admixture with archaic hominins [71] but even if we excluded this  
277 haplogroup, there are other Y-chromosome basal lineages, as A0a1a  
278 observed in Cameroonian Bakola directly related to the A0a1 (xP114)  
279 present in Berbers from Algeria, or the primitive A1a clade observed in  
280 Fulbe and Tuareg from Niger and also found in Moroccan Berbers, that  
281 consistently points to an early migratory input from northwest to western  
282 Africa[64]. In addition, the genome-wide study of the above mentioned  
283 Shum Laka fossil specimens clearly showed that these individuals are most  
284 similar to the present-day Central African pygmies than to the actual  
285 Cameroonian populations. This fact is reinforced by the presence of the  
286 central African Y-chromosome B2b-M112 and mtDNA L1c haplotypes in  
287 those specimens [71]. These results could be explained as the result of a  
288 post-Pleistocene turnover of a primitive autochthonous West African  
289 population or, most probably, as the retraction and subsequent  
290 substitution of a previously much more large central African population as  
291 also could be the case for the southern Chad [83].

292 **The geographic northeast progression of the mtDNA phylogeny:**

293 Haplogroup L5 was the next branch splitting off from macro-haplogroup  
294 L5'2'6'4'3 at approximately 235 Kya (STable 4). However, its basal sub-  
295 branches (L5a, L5b, and L5c) suffered long periods of stagnation not  
296 having subsequent ramifications until favorable climatic conditions during  
297 the last interglacial period (130-74 Kya), around 30 Kya, and after the  
298 LGM, in Holocene times. The core geographic area for this haplogroup  
299 comprises Tanzania, Kenya, Ethiopia and southern Sudan [84,85].  
300 However, secondary branches are predominant today in more specific  
301 regions or ethnic groups. For example, L5a1c1 is prevalent in Mbuti  
302 pygmies from central Africa, L5a1c2 concentrate in Kenya, and L5a2 and  
303 its subsequent radiations occur in southeastern African regions. Possible  
304 Y-chromosome counterparts of these early expansions through east and

305 northward Africa could be the A3b2-M13 and B2a1-M218 lineages [86,87].  
306 Even today, the geographic preeminence of L0, L1 and L5 basal lineages in  
307 southern, central and eastern Africa respectively, seems to be the  
308 remnants of a very ancient maternal structure in the African continent. It  
309 is interesting to compare this vision with the very similar results obtained  
310 from the analysis of ancient genome-wide genotype data from terminal  
311 Late Pleistocene and early Holocene African hunter gatherers that  
312 showed, in the same geographic area, a clinal pattern with individual  
313 genomes well represented by varying proportions of Central African  
314 pygmy, Southern African, and Ethiopian related ancestries [88]. However,  
315 in general, ancient DNA genome based studies focus on more recent  
316 population movements and turnovers and on the evidence of archaic  
317 introgression in the majority of the populations analyzed [71,89,90].

318 The wide chronological window open in eastern Africa by the L5  
319 coalescent interval (95% CI: 312 – 158 kya) allows to include in it the most  
320 notable fossil and stone assemblages excavated in this area as are the  
321 modern human remains recovered at Omo-Kibish (Ethiopia) and dated to  
322 more than 200 kya[91,92], or the Herto (Ethiopia) remains dated around  
323 160 kya[93]. The Sangoan-Lupemban lithic industries of equatorial Africa,  
324 mentioned above, have also been found at Lake Eyasi in Tanzania[94], and  
325 in Kenya at the Muguruk site[95], even most interesting is the presence of  
326 stratified Sangoan-Lupemban assemblages as far as northern Sudan, at Sai  
327 Island, dated around 230 kya that has been interpreted as the result of a  
328 possible human norward dispersal from equatorial Africa during the MIS 7  
329 interglacial period[96,97].

330 **An earlier out of Africa:** The next bifurcation in the mtDNA genomic tree  
331 separated two sister branches, L2 and the composite L3'4'6 with  
332 coalescent ages of 143 (111 – 176) kya and 185 (106 – 264) kya,  
333 respectively (Table 2). Based on its subsequent ramifications and present-  
334 day phylogeography, it has been suggested a western African origin for  
335 haplogroup L2 [98,99]. This seems to be in contradiction with the eastern  
336 geographic spread of its ancestral branch L5, and with the clear  
337 northeastern spread of its sister branch L3'4'6 [23,85,100]. However, as  
338 the earliest radiations of L2 occurred rather late, at around 60 kya,

339 involving eastern and western expansions, it seems more equidistant to  
340 assume a central African origin for L2, an alternative hypothesis also  
341 contemplated by other authors[98,99]. In any case, haplogroup L2 is a  
342 typical sub-Saharan African lineage that likewise their predecessors L0, L1  
343 and L5 did not participate in the out of Africa spread. It is the northeastern  
344 L3'4'6 cluster the progenitor of the entire Eurasian maternal diversity [23].  
345 Haplogroup L6 was the first lineage to split off from that composite clade.  
346 This rare lineage presents mean frequencies below 1% in northeastern  
347 Africa but, in spite of this, it is found at similar frequencies in Saudi  
348 Arabia[23] and in higher frequencies in Yemen[101,102]. Based on the L6  
349 tree[23] it appears that not all of the Arabian lineages are a subset of the  
350 African lineages, so that an early expansion of modern humans from Africa  
351 across Arabia has been suggested based on the haplogroup L6  
352 phylogeography[101]. In a similar vein, haplogroup L4, another minor  
353 eastern African mitochondrial lineage, has Arabian representatives in all  
354 their main sub-branches, excepting L4b2b [23], which also points to an  
355 early phylogeographic extension of this clade into the Arabian Peninsula.  
356 The sister clade of L4 is haplogroup L3 that houses the Eurasian branches  
357 M and N which contain all of the mtDNA diversity outside Africa [103]. It  
358 has been proposed that after the radiation of L3 in eastern Africa, the  
359 ancestors of M and N crossed the Bab al Mandab strait about 60 – 70 Kya  
360 (the previously calculated coalescent age for L3) and, following a southern  
361 coastal route, they spread all over the world [100,104–106]. As an  
362 alternative hypothesis, we have proposed that the clade L3'4'6 already  
363 extended its geographic range to southwestern Asia and that the splits of  
364 the L6 and L3'4 branches (Table 2) occurred at the outside margins of  
365 Africa, being the Y-chromosome counterpart of this early spread the  
366 haplogroup CT-M168 that includes the Eurasian haplogroups C, D and F  
367 and the African haplogroup E[23]. The ample statistical range of these  
368 mtDNA coalescent ages (Table 2) includes important archaeological finds  
369 in the region as the presence of early modern human populations in the  
370 Levant at Misliya Cave from 177 to 194 kya[8], and at Qafzeh[107,108] and  
371 Skhul[109,110] caves from 90 to 130 kya. These findings are in support of  
372 an early expansion of modern humans from northeast Africa through the  
373 northern Levantine route[111] which has also been proposed by mtDNA

374 [103,112] and genomic[113] data. However, fossil and previous genetic  
375 models propose different chronologies as the mtDNA and Y-chromosome  
376 dispersions are limited by the younger coalescent age of haplogroup L3  
377 and CT-M168 respectively, and those based on genomic data by the levels  
378 of haplotype diversity of the population outside Africa and the genome  
379 mutation rate. In addition, it seems that the comparison of the lithic  
380 industries, prevalent in the areas implied in the two routes out of Africa,  
381 show stronger technological and typological similarities between  
382 assemblages from the Horn of Africa and the Nile Valley and Arabia than  
383 any of these regions and the Levant[114,115], however, alternatives to  
384 this vision exist [116]. On the other hand, mainly two MSA archaeological  
385 eastern African connections with Arabia have been identified, suggesting  
386 early expansions of modern humans from the former to the later. The first  
387 involves the Jebel Faya 1 site (United Arab Emirates) assemblage C, dated  
388 to about 125 kya[117], which lithic technologies show similarities with  
389 MSA assemblages in northeast Africa, particularly with the late Sangoan  
390 [118]. The second evidence is founded on the similarities of the Dhofar  
391 (Oman) lithic material and the Late Nubian Complex a specific African  
392 industry that in Dhofar is dated at 106 kya[119]. These potential arrivals  
393 coincide with wet stages of MIS5, with the split of the mtDNA L3'4 clade  
394 (Table 2), and also with genomic results that place indigenous Arabs as  
395 direct descendants of the first Eurasian populations [120], showing a  
396 comparative excess of Basal Eurasian ancestry [121]. However, recent  
397 archaeological sequences excavated in different regions of Arabia have  
398 evidenced hominin presence since 400 kya in the Nefud Desert [122], and  
399 since 210 kya at Jebel Faya[123] enabling much older hominin expansions  
400 into the Peninsula or even to an autochthonous hominin evolution in  
401 southwest Asia that got extinct by adverse climatic cycles and/or the  
402 arrival of modern humans. Finally, it should be mentioned that an exit  
403 through the Bab al Mandab Strait does not guarantee the existence of a  
404 southern coastal route since an inland northward expansion is also  
405 possible [124]. Furthermore, from the gathered evidence, both, the  
406 northern and southern migratory routes could have been followed alike  
407 [125]. At this respect, the detection of Nubian assemblages at the Negev

408 highlands in the southern Levant dated to the MIS5 humid period is  
409 relevant [126].

410 **An earlier return to Africa:** After a period of maturation and stasis in  
411 southwestern Asia, mtDNA haplogroup L3 split in the region and while the  
412 ancestors of the L3 African subclades returned to Africa, the ancestors of  
413 the Eurasian branches M and N began their exodus eastwards[23].  
414 According to the new coalescent ages for the L3 subclades (Table 3), the  
415 first radiations in eastern Africa took place around 75 kya, at the beginning  
416 of the arid MIS 4 period. It was at this stage when an early modern human  
417 displacement by the Neanderthals in the Levant was attested [40]. The Y-  
418 chromosome counterpart of this mtDNA back flow to Africa was  
419 haplogroup E [127]. The detection, in the extant population of Saudi  
420 Arabia, of the basal African Y-chromosome lineage E-M96\*[128] is in  
421 support of this back flow. Furthermore, whole genome sequence analyses  
422 also favor models involving possible African returns 70-60 kya[129,130].  
423 Interestingly, a similar model, involving back flow to Africa, has been  
424 proposed to explain the complex mtDNA phylogeography of hamadryas  
425 baboons lineages present in Africa and Arabia [131].

426 The evidence gathered from the fossil and archaeological records for the  
427 proposed return to Africa has been only occasionally mentioned but,  
428 without generalized acceptance. Thus, it has been suggested that the Early  
429 Nubian Complex, developed at the end of MIS 6 beginning of MIS5 (145 –  
430 125 Kya) in northeast Africa, extended to Arabia where the Late Nubian  
431 Complex occurred and from there was reintroduced into Africa during  
432 MIS5a (85-75 kya)[132]. It is known that an early Nubian technology  
433 appeared at Gademotta (Ethiopia) after 180 kya[133], and that it succeeds  
434 the Lupemban at Sai Island (Sudan) after 150 kya[96]. In addition, at  
435 Sodemein Cave (Egypt), stratigraphic layers dated to  $121 \pm 15$  kya and  $87 \pm$   
436  $9$  kya are associated respectively with Early and Later Nubian complexes  
437 [134]. Potential modern human fossils coetaneous of these assemblages  
438 could be the Herto (Ethiopia) skull, dated to between 160 and 154 kya  
439 [135], and the Singa (Sudan) skull dated to  $133 \pm 2$  kya[136]. Other Late  
440 Nubian assemblages could be mentioned, for instance, at Aduma  
441 (Ethiopia) where it is associated with skeletal remains dated to 79-105 kya



442 [137] and in Taramsa Hill (Egypt) where it is at the same level of a child  
443 burial dated to  $68.6 \pm 8.0$  kya[138]. After the dry MIS4, a transformed  
444 Nubian technology is present at Nazlet Khater (Egypt) associated with  
445 modern human skeletal remains dated to around 40 kya[139], already  
446 within a generalized MIS 3 population fragmentation that propitiated the  
447 cultural differentiation evidenced by the Later Stone Age African diversity.  
448 It should be emphasized that the proposed return to Africa, inferred from  
449 the non-recombinant maternal haplogroup L3 and paternal haplogroup E  
450 lineages, was earlier, had a broader geographic distribution, and greater  
451 genetic impact than later Eurasian penetrations into Africa. At this respect,  
452 it is suffice to note that, on average, maternal L3 lineages represent 27%  
453 and paternal E lineages 72% of the female and male African genetic pools  
454 respectively [23]. Subsequent pre-Holocene and Holocene Eurasian waves  
455 into Africa, signaled mainly by mtDNA haplogroups M1 and U6 [140–144],  
456 and Y-chromosome haplogroups J1-M267, R-V88 and T-M70 [87,145–147]  
457 had more limited impact affecting mainly northern and northeastern  
458 Africa. Due to the fact that these secondary Eurasian flows did not reach  
459 southern Africa, the delayed presence in South Africa of Nubian  
460 technology dated to 60-50 kya[148], and the analysis of the Hofmeyr skull,  
461 dated at  $36.2 \pm 3.3$  kya, and showing strongest morphometric affinities  
462 with Upper Paleolithic Eurasians rather than present-day Khoisan [149],  
463 might be explained as the late arrival to the south of the proposed  
464 southwestern Asian reflux into Africa. The morphological affinities found  
465 between Hofmeyr and Nazlet Khater crania [150] are also in accordance  
466 with this hypothesis.

467

## 468 **Discussion**

469 **Journey and evolution of modern humans throughout Africa:** The  
470 proposition that the population from which modern humans evolved was  
471 located in northwest Africa is based on two main premises: first, it was the  
472 most probable place in which an ancestral hominin population bifurcated  
473 giving rise to the ancestors of the European Neanderthals and the African

474 humans [50]; second, it has been there where the oldest remains of our  
475 species have been found [5].

476 Uniparental marker phylogenies point to Central/Southern Africa as the  
477 place where the first split of that population occurred. The association of  
478 these groups with Sangoan and Lupemban lithic technologies agree in  
479 time and space, however, it seems a cultural throwback that descendant  
480 of the makers of Mousterian MSA industries [4] opted for more primitive  
481 lithic strategies, although this could be justified as a special adaptation to  
482 new environments. At this respect, it should be mentioned the presence  
483 of a Sangoan of northeastern Africa technology included over a  
484 northwestern Africa Levallois Mousterian substratum at Wadi Lazalim in  
485 southern Tunisia [97]. Afterward, molecular markers signal a clear  
486 northward geographic progression signaled by L5 and L3'4'6 mtDNA  
487 clades at the eastern African region and, less evidently, by the L2 clade at  
488 the central region. In northeastern Africa it seems that the sub-Saharan  
489 Sangoan/Lupemban was replaced by the Early Nubian technology [132]. It  
490 is also probable that in northern Africa it was the Aterian which evolved  
491 from previous sub-Saharan lithic industries [151]. Nevertheless, the out of  
492 African migrants carrying maternal clade L3'4'6 and paternal clade CT-  
493 M168 only could brought an Early Levantine Mousterian industry to the  
494 Levant and a possible related Lupemban technology to southern Arabia  
495 [117] and, afterwards, an Early Nubian technology that spread and  
496 differentiated across the whole peninsula [152]. These early demic  
497 spreads out of Africa into Eurasia, coinciding with humid periods as the  
498 end of MIS7 (around 190 ka) and MIS5e (around 130 kya), could  
499 satisfactorily explain the detection of anatomically modern human teeth  
500 in southern China dated to 120-80 Kya[9], the presence of an early  
501 modern human tooth in Sumatra at 73-63 kya[153], the archaeological  
502 evidence of a possible human arrival to northern Australia around 65 kya  
503 [154], or the genomic evidence of an ancient split between Africans and  
504 Papuans around 120 kya[10].

505 Although the non-recombining uniparental markers have drawn a clear  
506 trajectory of modern humans across Africa, this certainly has not been the  
507 case. The presence of other primitive human groups along the way had

508 undoubtedly promoted genetic admixture events that, unnoticed by  
509 uniparental markers, have been reflected in the genome of modern  
510 Africans [155,156] and their Eurasian descendants several times [157,158].  
511 Furthermore, extinction events generated by simple genetic drift could  
512 affect more frequently to uniparental markers than whole genomes. Thus,  
513 some early demographic expansions detected by the analysis of complete  
514 genomes in current populations might not be perceived by the same  
515 analysis in uniparental markers. However, in spite these caveats, the  
516 phylogeny and phylogeography of mtDNA and Y-chromosome lineages  
517 seem to find a coherent reflection in the archaeological and  
518 anthropological records and might open the way for more detailed  
519 interdisciplinary studies.

520 A graphical map of the proposed modern human route and its cultural,  
521 physical, and genetic evolution across Africa is depicted in Fig 1.

### 522 **Fig 1. Modern human evolution across Africa and beyond**

523 **The first back to Africa of modern humans:** The first out of Africa and  
524 back again for modern humans was proposed based on a nested cladistic  
525 analysis of the Y-chromosome variation (Hammer [159], and was  
526 supported by applying a most parsimonious criterion at an unbiased Y-  
527 chromosome tree [127]. Searching for a female counterpart, it was  
528 suggested that mtDNA haplogroup L3 also signals an early return to Africa  
529 [23] and, recently, this backflow to Africa has also been detected by whole  
530 genomic data [129]. The relatively closer morphological affinities of some  
531 African fossils with coetaneous Eurasian remains rather than with current  
532 African groups that have never abandoned the African continent [150],  
533 could also be taken in favor of this return to Africa. However, the  
534 archaeological support is much weaker because, although the temporal  
535 margins of the appearance and development of the Early and Late Nubian  
536 technological complexes are into the range proposed by the genetic  
537 markers, a clear geographical and temporal separation between these two  
538 lithic variants have not been yet determined. Therefore, it remains to  
539 deepen into this possibility suggested only by a few [132].

540 A graphical map of the proposed early return to Africa of modern humans  
541 and its genetic and archaeological support is depicted in Fig 2.

542 **Fig.2 Modern human early return to Africa from southwest Asia.**

## 543 References

- 544 1. Lewin R. Human evolution: an illustrated introduction. John Wiley & Sons;  
545 2009.
- 546  
547 2. Cann RL, Stoneking M, Wilson AC. Mitochondrial DNA and human evolution.  
548 Nature. Nature Publishing Group; 1987;325(6099):31–6.
- 549  
550 3. Watson E, Forster P, Richards M, Bandelt H-J. Mitochondrial footprints of  
551 human expansions in Africa. The American Journal of Human Genetics.  
552 Elsevier; 1997;61(3):691–704.
- 553  
554 4. Richter D, Grün R, Joannes-Boyau R, Steele TE, Amani F, Rué M, et al. The age  
555 of the hominin fossils from Jebel Irhoud, Morocco, and the origins of the Middle  
556 Stone Age. Nature. Nature Publishing Group; 2017;546(7657):293–6.
- 557  
558 5. Hublin J-J, Ben-Ncer A, Bailey SE, Freidline SE, Neubauer S, Skinner MM, et  
559 al. New fossils from Jebel Irhoud, Morocco and the pan-African origin of Homo  
560 sapiens. Nature. Nature Publishing Group; 2017;546(7657):289–92.
- 561  
562 6. Brooks AS, Yellen JE, Potts R, Behrensmeyer AK, Deino AL, Leslie DE, et al.  
563 Long-distance stone transport and pigment use in the earliest Middle Stone Age.  
564 Science. American Association for the Advancement of Science;  
565 2018;360(6384):90–4.
- 566  
567 7. Deino AL, Behrensmeyer AK, Brooks AS, Yellen JE, Sharp WD, Potts R.  
568 Chronology of the Acheulean to Middle Stone Age transition in eastern Africa.  
569 Science. American Association for the Advancement of Science;  
570 2018;360(6384):95–8.
- 571  
572 8. Hershkovitz I, Weber GW, Quam R, Duval M, Grün R, Kinsley L, et al. The  
573 earliest modern humans outside Africa. Science. American Association for the  
574 Advancement of Science; 2018;359(6374):456–9.
- 575  
576 9. Liu W, Martínón-Torres M, Cai Y, Xing S, Tong H, Pei S, et al. The earliest  
577 unequivocally modern humans in southern China. Nature. Nature Publishing  
578 Group; 2015;526(7575):696–9.
- 579  
580 10. Pagani L, Lawson DJ, Jagoda E, Mörseburg A, Eriksson A, Mitt M, et al.  
581 Genomic analyses inform on migration events during the peopling of Eurasia.  
582 Nature. Nature Publishing Group; 2016;538(7624):238–42.
- 583  
584 11. Malaspinas A-S, Westaway MC, Muller C, Sousa VC, Lao O, Alves I, et al. A  
585 genomic history of Aboriginal Australia. Nature. Nature Publishing Group;

- 586 2016;538(7624):207–14.  
587
- 588 12. Mallick S, Li H, Lipson M, Mathieson I, Gymrek M, Racimo F, et al. The  
589 Simons genome diversity project: 300 genomes from 142 diverse populations.  
590 Nature. Nature Publishing Group; 2016;538(7624):201–6.  
591
- 592 13. Bergström A, Stringer C, Hajdinjak M, Scerri EM, Skoglund P. Origins of  
593 modern human ancestry. Nature. Nature Publishing Group; 2021;590(7845):229–  
594 37.  
595
- 596 14. Cabrera VM. Human molecular evolutionary rate, time dependency and transient  
597 polymorphism effects viewed through ancient and modern mitochondrial DNA  
598 genomes. Scientific Reports. Nature Publishing Group; 2021;11(1):1–8.  
599
- 600 15. Scally A, Durbin R. Revising the human mutation rate: implications for  
601 understanding human evolution. Nat Rev Genet. 2012;13(10):745–53.  
602
- 603 16. Zaidi AA, Wilton PR, Su MS-W, Paul IM, Arbeithuber B, Anthony K, et al.  
604 Bottleneck and selection in the germline and maternal age influence transmission  
605 of mitochondrial DNA in human pedigrees. Proceedings of the National  
606 Academy of Sciences. National Acad Sciences; 2019;116(50):25172–8.  
607
- 608 17. Rebolledo-Jaramillo B, Su MS-W, Stoler N, McElhoe JA, Dickins B,  
609 Blankenberg D, et al. Maternal age effect and severe germ-line bottleneck in the  
610 inheritance of human mitochondrial DNA. Proceedings of the National Academy  
611 of Sciences. National Acad Sciences; 2014;111(43):15474–9.  
612
- 613 18. Soares P, Ermini L, Thomson N, Mormina M, Rito T, Röhl A, et al. Correcting  
614 for purifying selection: an improved human mitochondrial molecular clock. The  
615 American Journal of Human Genetics. Elsevier; 2009;84(6):740–59.  
616
- 617 19. Henn BM, Gignoux CR, Feldman MW, Mountain JL. Characterizing the time  
618 dependency of human mitochondrial DNA mutation rate estimates. Molecular  
619 biology and evolution. Oxford University Press; 2009;26(1):217–30.  
620
- 621 20. Ho SYW, Larson G. Molecular clocks: when times are a-changin'. Trends Genet.  
622 2006;22(2):79–83.  
623
- 624 21. Cabrera VM. Counterbalancing the time-dependent effect on the human  
625 mitochondrial DNA molecular clock. BMC Evolutionary Biology. BioMed  
626 Central; 2020;20(1):1–9.  
627
- 628 22. Van Oven M, Kayser M. Updated comprehensive phylogenetic tree of global  
629 human mitochondrial DNA variation. Human mutation. Wiley Online Library;  
630 2009;30(2):E386–E394.  
631
- 632 23. Cabrera VM, Marrero P, Abu-Amero KK, Larruga JM. Carriers of mitochondrial  
633 DNA macrohaplogroup L3 basal lineages migrated back to Africa from Asia  
634 around 70,000 years ago. BMC evolutionary biology. BioMed Central;

- 635 2018;18(1):1–16.  
636
- 637 24. Bandelt HJ, Forster P, Röhl A. Median-joining networks for inferring  
638 intraspecific phylogenies. *Mol Biol Evol.* 1999;16(1):37–48.  
639
- 640 25. Forster P, Harding R, Torroni A, Bandelt HJ. Origin and evolution of Native  
641 American mtDNA variation: a reappraisal. *Am J Hum Genet.* 1996;59(4):935–  
642 45.  
643
- 644 26. Schwartz JH, Tattersall I. Defining the genus *Homo*. *Science. American*  
645 *Association for the Advancement of Science*; 2015;349(6251):931–2.  
646
- 647 27. Barash A, Belmaker M, Bastir M, Soudack M, O’Brien HD, Woodward H, et al.  
648 The earliest Pleistocene record of a large-bodied hominin from the Levant  
649 supports two out-of-Africa dispersal events. *Scientific reports. Nature Publishing*  
650 *Group*; 2022;12(1):1–9.  
651
- 652 28. Herries AI, Martin JM, Leece A, Adams JW, Boschian G, Joannes-Boyau R, et  
653 al. Contemporaneity of *Australopithecus*, *Paranthropus*, and early *Homo erectus*  
654 in South Africa. *Science. American Association for the Advancement of Science*;  
655 2020;368(6486):eaaw7293.  
656
- 657 29. Belmaker M, Tchernov E, Condemi S, Bar-Yosef O. New evidence for hominid  
658 presence in the Lower Pleistocene of the Southern Levant. *Journal of Human*  
659 *Evolution. Elsevier*; 2002;43(1):43–56.  
660
- 661 30. Lordkipanidze D, Ponce de León MS, Margvelashvili A, Rak Y, Rightmire GP,  
662 Vekua A, et al. A complete skull from Dmanisi, Georgia, and the evolutionary  
663 biology of early *Homo*. *Science. American Association for the Advancement of*  
664 *Science*; 2013;342(6156):326–31.  
665
- 666 31. Zhu Z-Y, Dennell R, Huang W-W, Wu Y, Rao Z-G, Qiu S-F, et al. New dating  
667 of the *Homo erectus* cranium from Lantian (Gongwangling), China. *Journal of*  
668 *Human Evolution. Elsevier*; 2015;78:144–57.  
669
- 670 32. Matsu’ura S, Kondo M, Danhara T, Sakata S, Iwano H, Hirata T, et al. Age  
671 control of the first appearance datum for Javanese *Homo erectus* in the Sangiran  
672 area. *Science. American Association for the Advancement of Science*;  
673 2020;367(6474):210–4.  
674
- 675 33. Rightmire GP. *Homo erectus* and Middle Pleistocene hominins: brain size, skull  
676 form, and species recognition. *Journal of Human Evolution. Elsevier*;  
677 2013;65(3):223–52.  
678
- 679 34. Hedges SB, Marin J, Suleski M, Paymer M, Kumar S. Tree of life reveals clock-  
680 like speciation and diversification. *Molecular biology and evolution. Oxford*  
681 *University Press*; 2015;32(4):835–45.  
682
- 683 35. Green RE, Malaspinas A-S, Krause J, Briggs AW, Johnson PL, Uhler C, et al. A  
684 complete Neandertal mitochondrial genome sequence determined by high-

- 685 throughput sequencing. *Cell*. Elsevier; 2008;134(3):416–26.  
686
- 687 36. Meyer M, Fu Q, Aximu-Petri A, Glocke I, Nickel B, Arsuaga J-L, et al. A  
688 mitochondrial genome sequence of a hominin from Sima de los Huesos. *Nature*.  
689 Nature Publishing Group; 2014;505(7483):403–6.  
690
- 691 37. Meyer M, Arsuaga J-L, de Filippo C, Nagel S, Aximu-Petri A, Nickel B, et al.  
692 Nuclear DNA sequences from the Middle Pleistocene Sima de los Huesos  
693 hominins. *Nature*. Nature Publishing Group; 2016;531(7595):504–7.  
694
- 695 38. Slon V, Mafessoni F, Vernot B, de Filippo C, Grote S, Viola B, et al. The  
696 genome of the offspring of a Neanderthal mother and a Denisovan father. *Nature*.  
697 Nature Publishing Group; 2018;561(7721):113–6.  
698
- 699 39. Smith FH, Ahern JC, Jankovič I, Karavanič I. The Assimilation Model of  
700 modern human origins in light of current genetic and genomic knowledge.  
701 *Quaternary International*. Elsevier; 2017;450:126–36.  
702
- 703 40. Shea JJ. Neandertals, competition, and the origin of modern human behavior in  
704 the Levant. *Evolutionary Anthropology: Issues, News, and Reviews: Issues,*  
705 *News, and Reviews*. Wiley Online Library; 2003;12(4):173–87.  
706
- 707 41. Etler DA. *Homo erectus* in East Asia: Human Ancestor or Evolutionary Dead-  
708 End? *gene*. 1984;1992:2001.  
709
- 710 42. Slimak L, Zanolli C, Higham T, Frouin M, Schwenninger J-L, Arnold LJ, et al.  
711 Modern human incursion into Neanderthal territories 54,000 years ago at  
712 Mandrin, France. *Science Advances*. American Association for the Advancement  
713 of Science; 2022;8(6):eabj9496.  
714
- 715 43. Vaesen K, Dusseldorp GL, Brandt MJ. An emerging consensus in  
716 palaeoanthropology: demography was the main factor responsible for the  
717 disappearance of Neanderthals. *Scientific reports*. Nature Publishing Group;  
718 2021;11(1):1–9.  
719
- 720 44. Dalén L, Orlando L, Shapiro B, Brandström-Durling M, Quam R, Gilbert MTP,  
721 et al. Partial genetic turnover in neandertals: continuity in the east and population  
722 replacement in the west. *Molecular biology and evolution*. Oxford University  
723 Press; 2012;29(8):1893–7.  
724
- 725 45. Hublin J-J, Sirakov N, Aldeias V, Bailey S, Bard E, Delvigne V, et al. Initial  
726 upper palaeolithic *Homo sapiens* from Bacho Kiro cave, Bulgaria. *Nature*. Nature  
727 Publishing Group; 2020;581(7808):299–302.  
728
- 729 46. Prüfer K, Posth C, Yu H, Stöessel A, Spyrou MA, Deviese T, et al. A genome  
730 sequence from a modern human skull over 45,000 years old from Zlatý kůvn  
731 in Czechia. *Nature ecology & evolution*. Nature Publishing Group;  
732 2021;5(6):820–5.  
733

- 734 47. Mendez FL, Poznik GD, Castellano S, Bustamante CD. The divergence of  
735 Neandertal and modern human Y chromosomes. *The American Journal of*  
736 *Human Genetics*. Elsevier; 2016;98(4):728–34.  
737
- 738 48. Meyer M, Kircher M, Gansauge M-T, Li H, Racimo F, Mallick S, et al. A high-  
739 coverage genome sequence from an archaic Denisovan individual. *Science*.  
740 American Association for the Advancement of Science; 2012;338(6104):222–6.  
741
- 742 49. Petr M, Hajdinjak M, Fu Q, Essel E, Rougier H, Crevecoeur I, et al. The  
743 evolutionary history of Neanderthal and Denisovan Y chromosomes. *Science*.  
744 American Association for the Advancement of Science; 2020;369(6511):1653–6.  
745
- 746 50. Cabrera VM. Revisiting the hominin phylogeny: An alternative introgression  
747 scenario to reconcile the uniparental and autosomal DNA topologies. *Journal of*  
748 *Phylogenetics & Evolutionary Biology*. 2021;9(8):171.  
749
- 750 51. Prüfer K, Racimo F, Patterson N, Jay F, Sankararaman S, Sawyer S, et al. The  
751 complete genome sequence of a Neanderthal from the Altai Mountains. *Nature*.  
752 Nature Publishing Group; 2014;505(7481):43–9.  
753
- 754 52. Van de Loosdrecht M, Bouzouggar A, Humphrey L, Posth C, Barton N, Aximu-  
755 Petri A, et al. Pleistocene North African genomes link near Eastern and sub-  
756 Saharan African human populations. *Science*. American Association for the  
757 Advancement of Science; 2018;360(6388):548–52.  
758
- 759 53. Fregel R, Méndez FL, Bokbot Y, Mart'in-Socas D, Camalich-Massieu MD,  
760 Santana J, et al. Ancient genomes from North Africa evidence prehistoric  
761 migrations to the Maghreb from both the Levant and Europe. *Proceedings of the*  
762 *National Academy of Sciences*. National Acad Sciences; 2018;115(26):6774–9.  
763
- 764 54. Arredi B, Poloni ES, Paracchini S, Zerjal T, Fathallah DM, Makrelouf M, et al. A  
765 predominantly neolithic origin for Y-chromosomal DNA variation in North  
766 Africa. *The American Journal of Human Genetics*. Elsevier; 2004;75(2):338–45.  
767
- 768 55. Cruciani F, Trombetta B, Massaia A, Destro-Bisol G, Sellitto D, Scozzari R. A  
769 revised root for the human Y chromosomal phylogenetic tree: the origin of  
770 patrilineal diversity in Africa. *The American Journal of Human Genetics*.  
771 Elsevier; 2011;88(6):814–8.  
772
- 773 56. Grün R, Pike A, McDermott F, Eggins S, Mortimer G, Aubert M, et al. Dating  
774 the skull from Broken Hill, Zambia, and its position in human evolution. *Nature*.  
775 Nature Publishing Group; 2020;580(7803):372–5.  
776
- 777 57. Bräuer G, Yokoyama Y, Falguères C, Mbua E, others. Modern human origins  
778 backdated. *Nature*. *Nature*; 1997;386(6623):337–8.  
779
- 780 58. Fan S, Kelly DE, Beltrame MH, Hansen ME, Mallick S, Ranciaro A, et al.  
781 African evolutionary history inferred from whole genome sequence data of 44  
782 indigenous African populations. *Genome Biology*. Springer; 2019;20(1):1–14.  
783



- 784 59. Chan EK, Hardie R-A, Petersen DC, Beeson K, Bornman RM, Smith AB, et al.  
785 Revised timeline and distribution of the earliest diverged human maternal  
786 lineages in southern Africa. *PLoS one*. Public Library of Science San Francisco,  
787 CA USA; 2015;10(3):e0121223.  
788
- 789 60. Batini C, Lopes J, Behar DM, Calafell F, Jorde LB, Van der Veen L, et al.  
790 Insights into the demographic history of African Pygmies from complete  
791 mitochondrial genomes. *Molecular biology and evolution*. Oxford University  
792 Press; 2011;28(2):1099–110.  
793
- 794 61. Barbieri C, Hübner A, Macholdt E, Ni S, Lippold S, Schröder R, et al. Refining  
795 the Y chromosome phylogeny with southern African sequences. *Human genetics*.  
796 Springer; 2016;135(5):541–53.  
797
- 798 62. Naidoo T, Xu J, Vicente M, Malmström H, Soodyall H, Jakobsson M, et al. Y-  
799 chromosome variation in Southern African Khoe-San populations based on  
800 whole-genome sequences. *Genome biology and evolution*. Oxford University  
801 Press; 2020;12(7):1031–9.  
802
- 803 63. Martiniano R, De Sanctis B, Hallast P, Durbin R. Placing ancient DNA  
804 sequences into reference phylogenies. *Molecular biology and evolution*. Oxford  
805 University Press; 2022;39(2):msac017.  
806
- 807 64. Scozzari R, Massaia A, Trombetta B, Bellusci G, Myres NM, Novelletto A, et al.  
808 An unbiased resource of novel SNP markers provides a new chronology for the  
809 human Y chromosome and reveals a deep phylogenetic structure in Africa.  
810 *Genome research*. Cold Spring Harbor Lab; 2014;24(3):535–44.  
811
- 812 65. Batini C, Ferri G, Destro-Bisol G, Brisighelli F, Luiselli D, Sánchez-Diz P, et al.  
813 Signatures of the preagricultural peopling processes in sub-Saharan Africa as  
814 revealed by the phylogeography of early Y chromosome lineages. *Molecular  
815 biology and evolution*. Oxford University Press; 2011;28(9):2603–13.  
816
- 817 66. Schlebusch CM, Malmström H, Günther T, Sjödin P, Coutinho A, Edlund H, et  
818 al. Southern African ancient genomes estimate modern human divergence to  
819 350,000 to 260,000 years ago. *Science*. American Association for the  
820 Advancement of Science; 2017;358(6363):652–5.  
821
- 822 67. Schuster SC, Miller W, Ratan A, Tomsho LP, Giardine B, Kasson LR, et al.  
823 Complete Khoisan and Bantu genomes from southern Africa. *Nature*. Nature  
824 Publishing Group; 2010;463(7283):943–7.  
825
- 826 68. Hollfelder N, Breton G, Sjödin P, Jakobsson M. The deep population history in  
827 Africa. *Human Molecular Genetics*. Oxford University Press; 2021;30(R1):R2–  
828 R10.  
829
- 830 69. Hsieh P, Veeramah KR, Lachance J, Tishkoff SA, Wall JD, Hammer MF, et al.  
831 Whole-genome sequence analyses of Western Central African Pygmy hunter-  
832 gatherers reveal a complex demographic history and identify candidate genes  
833 under positive natural selection. *Genome Research*. Cold Spring Harbor Lab;

- 834 2016;26(3):279–90.  
835
- 836 70. Morris AG, Heinze A, Chan EK, Smith AB, Hayes VM. First ancient  
837 mitochondrial human genome from a prepastoralist southern African. *Genome*  
838 *biology and evolution*. Oxford University Press; 2014;6(10):2647–53.  
839
- 840 71. Lipson M, Ribot I, Mallick S, Rohland N, Olalde I, Adamski N, et al. Ancient  
841 West African foragers in the context of African population history. *Nature*.  
842 Nature Publishing Group; 2020;577(7792):665–70.  
843
- 844 72. Barham L. Backed tools in Middle Pleistocene central Africa and their  
845 evolutionary significance. *Journal of Human Evolution*. Elsevier;  
846 2002;43(5):585–603.  
847
- 848 73. Taylor N. Across rainforests and woodlands: a systematic reappraisal of the  
849 Lupemban Middle Stone Age in Central Africa. *Africa from MIS 6-2*. Springer;  
850 2016;273–99.  
851
- 852 74. Grün R, Brink JS, Spooner NA, Taylor L, Stringer CB, Franciscus RG, et al.  
853 Direct dating of Florisbad hominid. *Nature*. Nature Publishing Group;  
854 1996;382(6591):500–1.  
855
- 856 75. Dirks PH, Roberts EM, Hilbert-Wolf H, Kramers JD, Hawks J, Dosseto A, et al.  
857 The age of *Homo naledi* and associated sediments in the Rising Star Cave, South  
858 Africa. *Elife*. eLife Sciences Publications Limited; 2017;6:e24231.  
859
- 860 76. Scerri EM, Blinkhorn J, Niang K, Bateman MD, Groucutt HS. Persistence of  
861 Middle Stone Age technology to the Pleistocene/Holocene transition supports a  
862 complex hominin evolutionary scenario in West Africa. *Journal of*  
863 *Archaeological Science: Reports*. Elsevier; 2017;11:639–46.  
864
- 865 77. Niang K. The Early and Middle Stone Age of Senegal, West Africa.  
866
- 867 78. De Weyer L. An Early Stone Age in Western Africa? Spheroids and polyhedrons  
868 at Ounjougou, Mali. *Journal of Lithic Studies*. 2017;4(1).  
869
- 870 79. Wurz S. Southern and east African Middle Stone Age: geography and culture.  
871 *Encyclopedia of global archaeology*. Springer New York; 2014;2014:6890–912.  
872
- 873 80. Harvati K, Stringer C, Grün R, Aubert M, Allsworth-Jones P, Folorunso CA. The  
874 later stone age calvaria from Iwo Eleru, Nigeria: Morphology and chronology.  
875 *PLoS One*. Public Library of Science San Francisco, USA; 2011;6(9):e24024.  
876
- 877 81. Stojanowski CM. Iwo Eleru’s place among late Pleistocene and early Holocene  
878 populations of north and East Africa. *Journal of human evolution*. Elsevier;  
879 2014;75:80–9.  
880
- 881 82. Mendez FL, Krahn T, Schrack B, Krahn A-M, Veeramah KR, Woerner AE, et al.  
882 An African American paternal lineage adds an extremely ancient root to the  
883 human Y chromosome phylogenetic tree. *The American Journal of Human*

- 884 Genetics. Elsevier; 2013;92(3):454–9.  
885
- 886 83. Shriner D, Rotimi CN. Genetic history of Chad. American journal of physical  
887 anthropology. Wiley Online Library; 2018;167(4):804–12.  
888
- 889 84. Gonder MK, Mortensen HM, Reed FA, de Sousa A, Tishkoff SA. Whole-  
890 mtDNA genome sequence analysis of ancient African lineages. Molecular  
891 biology and evolution. Oxford University Press; 2007;24(3):757–68.  
892
- 893 85. Gomes V, Pala M, Salas A, Álvarez-Iglesias V, Amorim A, Gómez-Carballa A,  
894 et al. Mosaic maternal ancestry in the Great Lakes region of East Africa. Human  
895 genetics. Springer; 2015;134(9):1013–27.  
896
- 897 86. Gomes V, Sánchez-Diz P, Amorim A, Carracedo Á, Gusmão L. Digging deeper  
898 into East African human Y chromosome lineages. Human genetics. Springer;  
899 2010;127(5):603–13.  
900
- 901 87. Hassan HY, Underhill PA, Cavalli-Sforza LL, Ibrahim ME. Y-chromosome  
902 variation among Sudanese: restricted gene flow, concordance with language,  
903 geography, and history. American Journal of Physical Anthropology: The  
904 Official Publication of the American Association of Physical Anthropologists.  
905 Wiley Online Library; 2008;137(3):316–23.  
906
- 907 88. Lipson M, Sawchuk EA, Thompson JC, Oppenheimer J, Tryon CA, Ranhorn KL,  
908 et al. Ancient DNA and deep population structure in sub-Saharan African  
909 foragers. Nature. Nature Publishing Group; 2022;603(7900):290–6.  
910
- 911 89. Lachance J, Vernot B, Elbers CC, Ferwerda B, Froment A, Bodo J-M, et al.  
912 Evolutionary history and adaptation from high-coverage whole-genome  
913 sequences of diverse African hunter-gatherers. Cell. Elsevier; 2012;150(3):457–  
914 69.  
915
- 916 90. Skoglund P, Thompson JC, Prendergast ME, Mittnik A, Sirak K, Hajdinjak M, et  
917 al. Reconstructing prehistoric African population structure. Cell. Elsevier;  
918 2017;171(1):59–71.  
919
- 920 91. McDougall I, Brown FH, Fleagle JG. Stratigraphic placement and age of modern  
921 humans from Kibish, Ethiopia. nature. Nature Publishing Group;  
922 2005;433(7027):733–6.  
923
- 924 92. Vidal CM, Lane CS, Asrat A, Barfod DN, Mark DF, Tomlinson EL, et al. Age of  
925 the oldest known Homo sapiens from eastern Africa. Nature. Nature Publishing  
926 Group; 2022;601(7894):579–83.  
927
- 928 93. Clark JD, Beyene Y, WoldeGabriel G, Hart WK, Renne PR, Gilbert H, et al.  
929 Stratigraphic, chronological and behavioural contexts of Pleistocene Homo  
930 sapiens from Middle Awash, Ethiopia. Nature. Nature Publishing Group;  
931 2003;423(6941):747–52.  
932

- 933 94. Masao FT. Characterizing archaeological assemblages from eastern Lake Natron,  
934 Tanzania: results of fieldwork conducted in the area. *African Archaeological*  
935 *Review*. Springer; 2015;32(1):137–62.  
936
- 937 95. McBrearty S, Tryon C. From Acheulean to middle stone age in the Kapthurin  
938 formation, Kenya. *Transitions before the transition*. Springer; 2006. p. 257–77.  
939
- 940 96. Van Peer P, Fullagar R, Stokes S, Bailey RM, Moeyersons J, Steenhoudt F, et al.  
941 The Early to Middle Stone Age transition and the emergence of modern human  
942 behaviour at site 8-B-11, Sai Island, Sudan. *Journal of Human Evolution*.  
943 Academic Press; 2003;45(2):187–93.  
944
- 945 97. Cancellieri E, Bel Hadj Brahim H, Ben Nasr J, Ben Fraj T, Boussoffara R, Di  
946 Matteo M, et al. A late Middle Pleistocene Middle Stone Age sequence identified  
947 at Wadi Lazalim in southern Tunisia. *Scientific reports*. Nature Publishing  
948 Group; 2022;12(1):1–12.  
949
- 950 98. Salas A, Richards M, De la Fe T, Lareu M-V, Sobrino B, Sánchez-Diz P, et al.  
951 The making of the African mtDNA landscape. *The American Journal of Human*  
952 *Genetics*. Elsevier; 2002;71(5):1082–111.  
953
- 954 99. Silva M, Alshamali F, Silva P, Carrilho C, Mandlate F, Jesus Trovoada M, et al.  
955 60,000 years of interactions between Central and Eastern Africa documented by  
956 major African mitochondrial haplogroup L2. *Scientific reports*. Nature  
957 Publishing Group; 2015;5(1):1–13.  
958
- 959 100. Soares P, Alshamali F, Pereira JB, Fernandes V, Silva NM, Afonso C, et al. The  
960 expansion of mtDNA haplogroup L3 within and out of Africa. *Molecular biology*  
961 *and evolution*. Oxford University Press; 2012;29(3):915–27.  
962
- 963 101. Kivisild T, Reidla M, Metspalu E, Rosa A, Brehm A, Pennarun E, et al.  
964 Ethiopian mitochondrial DNA heritage: tracking gene flow across and around the  
965 gate of tears. *The American Journal of Human Genetics*. Elsevier;  
966 2004;75(5):752–70.  
967
- 968 102. \vCern\`y V, \vC`i\vzková M, Poloni ES, Al-Meerri A, Mulligan CJ.  
969 Comprehensive view of the population history of Arabia as inferred by mt DNA  
970 variation. *American Journal of Physical Anthropology*. Wiley Online Library;  
971 2016;159(4):607–16.  
972
- 973 103. Maca-Meyer N, González AM, Larruga JM, Flores C, Cabrera VM. Major  
974 genomic mitochondrial lineages delineate early human expansions. *BMC*  
975 *genetics*. BioMed Central; 2001;2(1):1–8.  
976
- 977 104. Metspalu M, Kivisild T, Metspalu E, Parik J, Hudjashov G, Kaldma K, et al.  
978 Most of the extant mtDNA boundaries in south and southwest Asia were likely  
979 shaped during the initial settlement of Eurasia by anatomically modern humans.  
980 *BMC genetics*. BioMed Central; 2004;5(1):1–25.  
981

- 982 105. Macaulay V, Hill C, Achilli A, Rengo C, Clarke D, Meehan W, et al. Single,  
983 rapid coastal settlement of Asia revealed by analysis of complete mitochondrial  
984 genomes. *Science*. American Association for the Advancement of Science;  
985 2005;308(5724):1034–6.  
986
- 987 106. Mellars P, Gori KC, Carr M, Soares PA, Richards MB. Genetic and  
988 archaeological perspectives on the initial modern human colonization of southern  
989 Asia. *Proceedings of the National Academy of Sciences*. National Acad Sciences;  
990 2013;110(26):10699–704.  
991
- 992 107. Yokoyama Y, Falgueres C, Lumley M. Direct dating of a Qafzeh proto-cro  
993 magnon skull by non destructive gamma-ray spectrometry. *Comptes Rendus de*  
994 *l’Academie des Sciences Serie 2, Sciences de la Terre et des Planetes*. 1997;773–  
995 9.  
996
- 997 108. Schwarcz HP, Grün R, Vandermeersch B, Bar-Yosef O, Valladas H, Tchernov E.  
998 ESR dates for the hominid burial site of Qafzeh in Israel. *Journal of Human*  
999 *Evolution*. Elsevier; 1988;17(8):733–7.  
1000
- 1001 109. Stringer C, Grün R, Schwarcz H, Goldberg P. ESR dates for the hominid burial  
1002 site of Es Skhul in Israel. *Nature*. Nature Publishing Group;  
1003 1989;338(6218):756–8.  
1004
- 1005 110. Mercier N, Valladas H, Bar-Yosef O, Vandermeersch B, Stringer C, Joron J-L.  
1006 Thermoluminescence date for the Mousterian burial site of Es-Skhul, Mt.  
1007 Carmel. *Journal of Archaeological Science*. Elsevier; 1993;20(2):169–74.  
1008
- 1009 111. Lahr MM, Foley R. Multiple dispersals and modern human origins. *Evolutionary*  
1010 *Anthropology: Issues, News, and Reviews*. Wiley Online Library; 1994;3(2):48–  
1011 60.  
1012
- 1013 112. Tanaka M, Cabrera VM, González AM, Larruga JM, Takeyasu T, Fuku N, et al.  
1014 Mitochondrial genome variation in eastern Asia and the peopling of Japan.  
1015 *Genome research*. Cold Spring Harbor Lab; 2004;14(10a):1832–50.  
1016
- 1017 113. Pagani L, Schiffels S, Gurdasani D, Danecek P, Scally A, Chen Y, et al. Tracing  
1018 the route of modern humans out of Africa by using 225 human genome  
1019 sequences from Ethiopians and Egyptians. *The American Journal of Human*  
1020 *Genetics*. Elsevier; 2015;96(6):986–91.  
1021
- 1022 114. Beyin A. The Bab al Mandab vs the Nile-Levant: an appraisal of the two  
1023 dispersal routes for early modern humans out of Africa. *African Archaeological*  
1024 *Review*. Springer; 2006;23(1):5–30.  
1025
- 1026 115. Richter J, Hauck T, Vogelsang R, Widlok T, Le Tensorer J-M, Schmid P.  
1027 “Contextual areas” of early Homo sapiens and their significance for human  
1028 dispersal from Africa into Eurasia between 200 ka and 70 ka. *Quaternary*  
1029 *International*. Elsevier; 2012;274:5–24.  
1030

- 1031 116. Van Peer P. Is there another Tabbun? ritual chronology and Middle Pleistocene  
1032 sequence at Tbn Cave, Israel. 2017; Unpublished document available at  
1033 [https://www.researchgate.net/profile/P\\_Peer/contributions](https://www.researchgate.net/profile/P_Peer/contributions)  
1034
- 1035 117. Armitage SJ, Jasim SA, Marks AE, Parker AG, Usik VI, Uerpmann H-P. The  
1036 southern route “out of Africa”: evidence for an early expansion of modern  
1037 humans into Arabia. *Science*. American Association for the Advancement of  
1038 Science; 2011;331(6016):453–6.  
1039
- 1040 118. Marks AE. The Paleolithic of Arabia in an inter-regional context. *The Evolution*  
1041 *of Human Populations in Arabia*. Springer; 2010. p. 295–308.  
1042
- 1043 119. Rose JI, Usik VI, Marks AE, Hilbert YH, Galletti CS, Parton A, et al. The  
1044 Nubian complex of Dhofar, Oman: an African middle stone age industry in  
1045 southern Arabia. *PloS one*. Public Library of Science San Francisco, USA;  
1046 2011;6(11):e28239.  
1047
- 1048 120. Rodriguez-Flores JL, Fakhro K, Agosto-Perez F, Ramstetter MD, Arbiza L,  
1049 Vincent TL, et al. Indigenous Arabs are descendants of the earliest split from  
1050 ancient Eurasian populations. *Genome research*. Cold Spring Harbor Lab;  
1051 2016;26(2):151–62.  
1052
- 1053 121. Almarri MA, Haber M, Lootah RA, Hallast P, Al Turki S, Martin HC, et al. The  
1054 genomic history of the Middle East. *Cell*. Elsevier; 2021;184(18):4612–25.  
1055
- 1056 122. Groucutt HS, White TS, Scerri EM, Andrieux E, Clark-Wilson R, Breeze PS, et  
1057 al. Multiple hominin dispersals into Southwest Asia over the past 400,000 years.  
1058 *Nature*. Nature Publishing Group; 2021;597(7876):376–80.  
1059
- 1060 123. Bretzke K, Preusser F, Jasim S, Miller C, Preston G, Raith K, et al. Multiple  
1061 phases of human occupation in Southeast Arabia between 210,000 and 120,000  
1062 years ago. *Scientific reports*. Nature Publishing Group; 2022;12(1):1–9.  
1063
- 1064 124. Groucutt HS, Petraglia MD, Bailey G, Scerri EM, Parton A, Clark-Balzan L, et  
1065 al. Rethinking the dispersal of *Homo sapiens* out of Africa. *Evolutionary*  
1066 *Anthropology: Issues, News, and Reviews*. Wiley Online Library;  
1067 2015;24(4):149–64.  
1068
- 1069 125. Blinkhorn J, Groucutt HS, Scerri EM, Petraglia MD, Blockley S. Directional  
1070 changes in Levallois core technologies between Eastern Africa, Arabia, and the  
1071 Levant during MIS 5. *Scientific reports*. Nature Publishing Group; 2021;11(1):1–  
1072 11.  
1073
- 1074 126. Goder-Goldberger M, Gubenko N, Hovers E. “Diffusion with modifications”:  
1075 Nubian assemblages in the central Negev highlands of Israel and their  
1076 implications for Middle Paleolithic inter-regional interactions. *Quaternary*  
1077 *International*. Elsevier; 2016;408:121–39.  
1078
- 1079 127. Poznik GD, Xue Y, Mendez FL, Willems TF, Massaia A, Wilson Sayres MA, et  
1080 al. Punctuated bursts in human male demography inferred from 1,244 worldwide

- 1081 Y-chromosome sequences. *Nature genetics*. Nature Publishing Group;  
1082 2016;48(6):593–9.  
1083
- 1084 128. Abu-Amero KK, Hellani A, González AM, Larruga JM, Cabrera VM, Underhill  
1085 PA. Saudi Arabian Y-Chromosome diversity and its relationship with nearby  
1086 regions. *BMC genetics*. BioMed Central; 2009;10(1):1–9.  
1087
- 1088 129. Cole CB, Zhu SJ, Mathieson I, Prüfer K, Lunter G. Ancient Admixture into  
1089 Africa from the ancestors of non-Africans. *bioRxiv*. Cold Spring Harbor  
1090 Laboratory; 2020;  
1091
- 1092 130. Montinaro F, Pankratov V, Yelmen B, Pagani L, Mondal M. Revisiting the out of  
1093 Africa event with a deep-learning approach. *The American Journal of Human  
1094 Genetics*. Elsevier; 2021;108(11):2037–51.  
1095
- 1096 131. Kopp GH, Roos C, Butynski TM, Wildman DE, Alagaili AN, Groeneveld LF, et  
1097 al. Out of Africa, but how and when? The case of hamadryas baboons (*Papio  
1098 hamadryas*). *Journal of Human Evolution*. Elsevier; 2014;76:154–64.  
1099
- 1100 132. Peer PV. Technological systems, population dynamics, and historical process in  
1101 the MSA of Northern Africa. *Africa from MIS 6-2*. Springer; 2016. p. 147–59.  
1102
- 1103 133. Douze K, Delagnes A. The pattern of emergence of a Middle Stone Age tradition  
1104 at Gademotta and Kulkuletti (Ethiopia) through convergent tool and point  
1105 technologies. *Journal of Human Evolution*. Elsevier; 2016;91:93–121.  
1106
- 1107 134. Mercier N, Valladas H, Froget L, Joron J-L, Vermeersch PM, Van Peer P, et al.  
1108 Thermoluminescence dating of a middle palaeolithic occupation at Sodmein  
1109 Cave, Red Sea Mountains (Egypt). *Journal of Archaeological Science*. Elsevier;  
1110 1999;26(11):1339–45.  
1111
- 1112 135. White TD, Asfaw B, DeGusta D, Gilbert H, Richards GD, Suwa G, et al.  
1113 Pleistocene homo sapiens from middle awash, ethiopia. *Nature*. Nature  
1114 Publishing Group; 2003;423(6941):742–7.  
1115
- 1116 136. McDermott F, Stringer C, Grün R, Williams C, Din V, Hawkesworth C. New  
1117 Late-Pleistocene uranium-thorium and ESR dates for the Singa hominid (Sudan).  
1118 *Journal of Human Evolution*. Elsevier; 1996;31(6):507–16.  
1119
- 1120 137. Yellen J, Brooks A, Helgren D, Tappen M, Ambrose S, Bonnefille R, et al. The  
1121 archaeology of aduma middle stone age sites in the Awash Valley, Ethiopia.  
1122 *PaleoAnthropology*. 2005;10(25):e100.  
1123
- 1124 138. Van Peer P, Vermeersch PM, Paulissen E. Chert quarrying, lithic technology and  
1125 a modern human burial at the Palaeolithic site of Taramsa 1, Upper Egypt.  
1126 Leuven university press; 2010.  
1127
- 1128 139. Crevecoeur I. The Upper Paleolithic human remains of Nazlet Khater 2 (Egypt)  
1129 and past modern human diversity. *Modern Origins*. Springer; 2012. p. 205–19.  
1130

- 1131 140. Maca-Meyer N, González AM, Pestano J, Flores C, Larruga JM, Cabrera VM.  
1132 Mitochondrial DNA transit between West Asia and North Africa inferred from  
1133 U6 phylogeography. *BMC genetics*. BioMed Central; 2003;4(1):1–11.  
1134
- 1135 141. Olivieri A, Achilli A, Pala M, Battaglia V, Fornarino S, Al-Zahery N, et al. The  
1136 mtDNA legacy of the Levantine early Upper Palaeolithic in Africa. *Science*.  
1137 American Association for the Advancement of Science; 2006;314(5806):1767–  
1138 70.  
1139
- 1140 142. González AM, Larruga JM, Abu-Amero KK, Shi Y, Pestano J, Cabrera VM.  
1141 Mitochondrial lineage M1 traces an early human backflow to Africa. *BMC*  
1142 *genomics*. BioMed Central; 2007;8(1):1–12.  
1143
- 1144 143. Pennarun E, Kivisild T, Metspalu E, Metspalu M, Reisberg T, Moisan J-P, et al.  
1145 Divorcing the Late Upper Palaeolithic demographic histories of mtDNA  
1146 haplogroups M1 and U6 in Africa. *BMC evolutionary biology*. Springer;  
1147 2012;12(1):1–12.  
1148
- 1149 144. Secher B, Fregel R, Larruga JM, Cabrera VM, Endicott P, Pestano JJ, et al. The  
1150 history of the North African mitochondrial DNA haplogroup U6 gene flow into  
1151 the African, Eurasian and American continents. *BMC evolutionary biology*.  
1152 Springer; 2014;14(1):1–17.  
1153
- 1154 145. Cruciani F, Trombetta B, Sellitto D, Massaia A, Destro-Bisol G, Watson E, et al.  
1155 Human Y chromosome haplogroup R-V88: a paternal genetic record of early mid  
1156 Holocene trans-Saharan connections and the spread of Chadic languages.  
1157 *European Journal of Human Genetics*. Nature Publishing Group;  
1158 2010;18(7):800–7.  
1159
- 1160 146. Cruciani F, Santolamazza P, Shen P, Macaulay V, Moral P, Olckers A, et al. A  
1161 back migration from Asia to sub-Saharan Africa is supported by high-resolution  
1162 analysis of human Y-chromosome haplotypes. *The American Journal of Human*  
1163 *Genetics*. Elsevier; 2002;70(5):1197–214.  
1164
- 1165 147. Mendez FL, Karafet TM, Krahn T, Ostrer H, Soodyall H, Hammer MF.  
1166 Increased resolution of Y chromosome haplogroup T defines relationships among  
1167 populations of the Near East, Europe, and Africa. *Human biology*. BioOne;  
1168 2011;83(1):39–53.  
1169
- 1170 148. Will M, Mackay A, Phillips N. Implications of Nubian-like core reduction  
1171 systems in southern Africa for the identification of early modern human  
1172 dispersals. *PLoS One*. Public Library of Science San Francisco, CA USA;  
1173 2015;10(6):e0131824.  
1174
- 1175 149. Grine FE, Bailey RM, Harvati K, Nathan RP, Morris AG, Henderson GM, et al.  
1176 Late Pleistocene human skull from Hofmeyr, South Africa, and modern human  
1177 origins. *Science*. American Association for the Advancement of Science;  
1178 2007;315(5809):226–9.  
1179



- 1180 150. Crevecoeur I, Rougier H, Grine F, Froment A. Modern human cranial diversity in  
1181 the Late Pleistocene of Africa and Eurasia: evidence from Nazlet Khater,  
1182 Pe\cstera cu Oase, and Hofmeyr. *American Journal of Physical Anthropology*:  
1183 The Official Publication of the American Association of Physical  
1184 Anthropologists. Wiley Online Library; 2009;140(2):347–58.  
1185
- 1186 151. Garcea EA. Crossing deserts and avoiding seas: Aterian North African-European  
1187 relations. *Journal of Anthropological Research*. University of New Mexico;  
1188 2004;60(1):27–53.  
1189
- 1190 152. Hilbert YH, Crassard R, Rose JI, Geiling JM, Usik VI. Technological  
1191 homogeneity within the Arabian Nubian Complex: Comparing chert and  
1192 quartzite assemblages from central and southern Arabia. *Journal of lithic Studies*.  
1193 2016;3(2):411–37.  
1194
- 1195 153. Westaway KE, Louys J, Awe R, Morwood MJ, Price GJ, Zhao J, et al. An early  
1196 modern human presence in Sumatra 73,000–63,000 years ago. *Nature*. Nature  
1197 Publishing Group; 2017;548(7667):322–5.  
1198
- 1199 154. Clarkson C, Jacobs Z, Marwick B, Fullagar R, Wallis L, Smith M, et al. Human  
1200 occupation of northern Australia by 65,000 years ago. *Nature*. Nature Publishing  
1201 Group; 2017;547(7663):306–10.  
1202
- 1203 155. Hammer MF, Woerner AE, Mendez FL, Watkins JC, Wall JD. Genetic evidence  
1204 for archaic admixture in Africa. *Proceedings of the National Academy of  
1205 Sciences*. National Acad Sciences; 2011;108(37):15123–8.  
1206
- 1207 156. Durvasula A, Sankararaman S. Recovering signals of ghost archaic introgression  
1208 in African populations. *Science Advances*. American Association for the  
1209 Advancement of Science; 2020;6(7):eaax5097.  
1210
- 1211 157. Sankararaman S, Mallick S, Patterson N, Reich D. The combined landscape of  
1212 Denisovan and Neanderthal ancestry in present-day humans. *Current Biology*.  
1213 Elsevier; 2016;26(9):1241–7.  
1214
- 1215 158. Massilani D, Skov L, Hajdinjak M, Gunchinsuren B, Tseveendorj D, Yi S, et al.  
1216 Denisovan ancestry and population history of early East Asians. *Science*.  
1217 American Association for the Advancement of Science; 2020;370(6516):579–83.  
1218
- 1219 159. Hammer MF, Karafet T, Rasanayagam A, Wood ET, Altheide TK, Jenkins T, et  
1220 al. Out of Africa and back again: nested cladistic analysis of human Y  
1221 chromosome variation. *Molecular biology and evolution*. 1998;15(4):427–41.  
1222  
1223

## 1224 **Supporting information captions**

1225 S1 Fig. Phylogenetic relationships between the main mtDNA African  
1226 clades.

- 1227 S2 Fig. Phylogeography of mtDNA haplogroup L2
- 1228 S3 Fig. Phylogeography of mtDNA haplogroup L6
- 1229 S4 Fig. Phylogeography of mtDNA haplogroup L4
- 1230 S1 Table. Mitochondrial sequences utilized for the phylogenetic and
- 1231 phylogeographic analyses.
- 1232 S2 Table. Age of the African mtDNA haplogroup L0.
- 1233 S3 Table. Age of the African mtDNA haplogroup L1.
- 1234 S4 Table. Age of the African mtDNA haplogroup L5.
- 1235 S5 Table. Age of the African mtDNA haplogroup L2.
- 1236 S6 Table. Age of the African mtDNA haplogroup L6.
- 1237 S7 Table. Age of the African mtDNA haplogroup L4.
- 1238 S8 Table. Age of the African mtDNA haplogroup L3.
- 1239

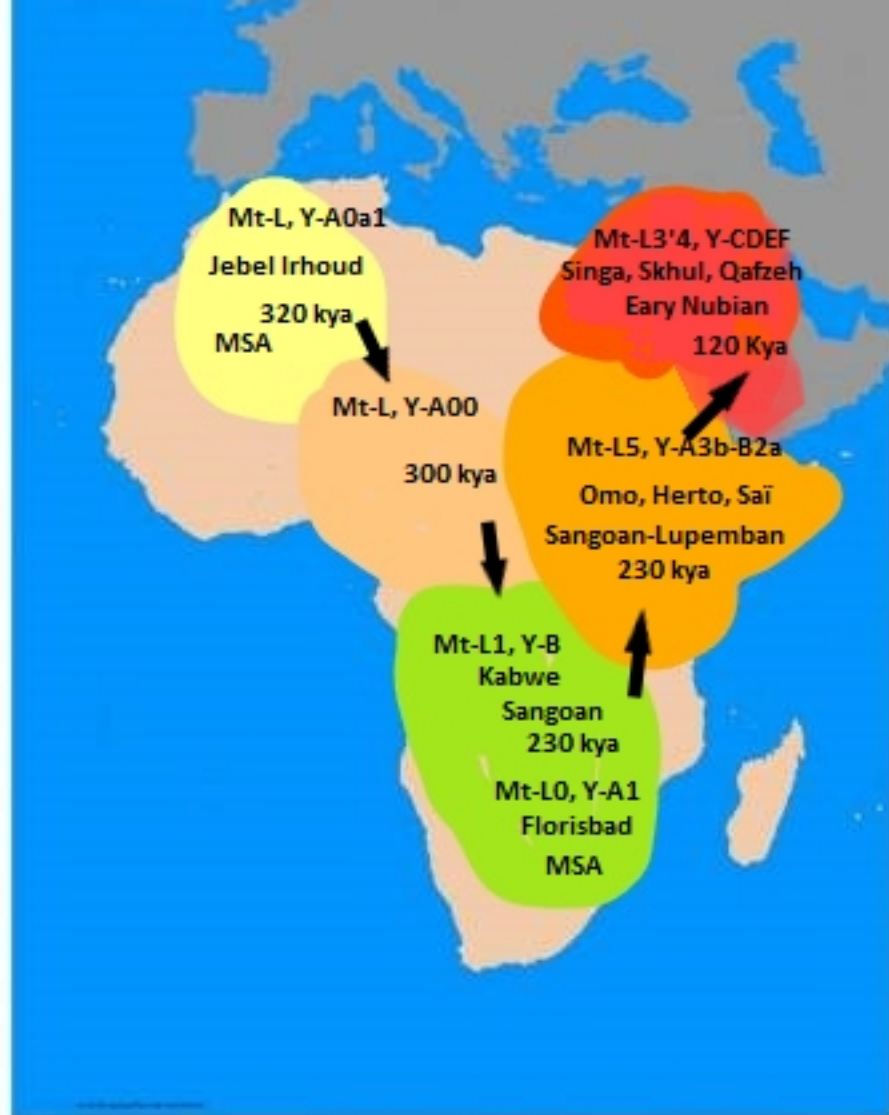

Figure 1

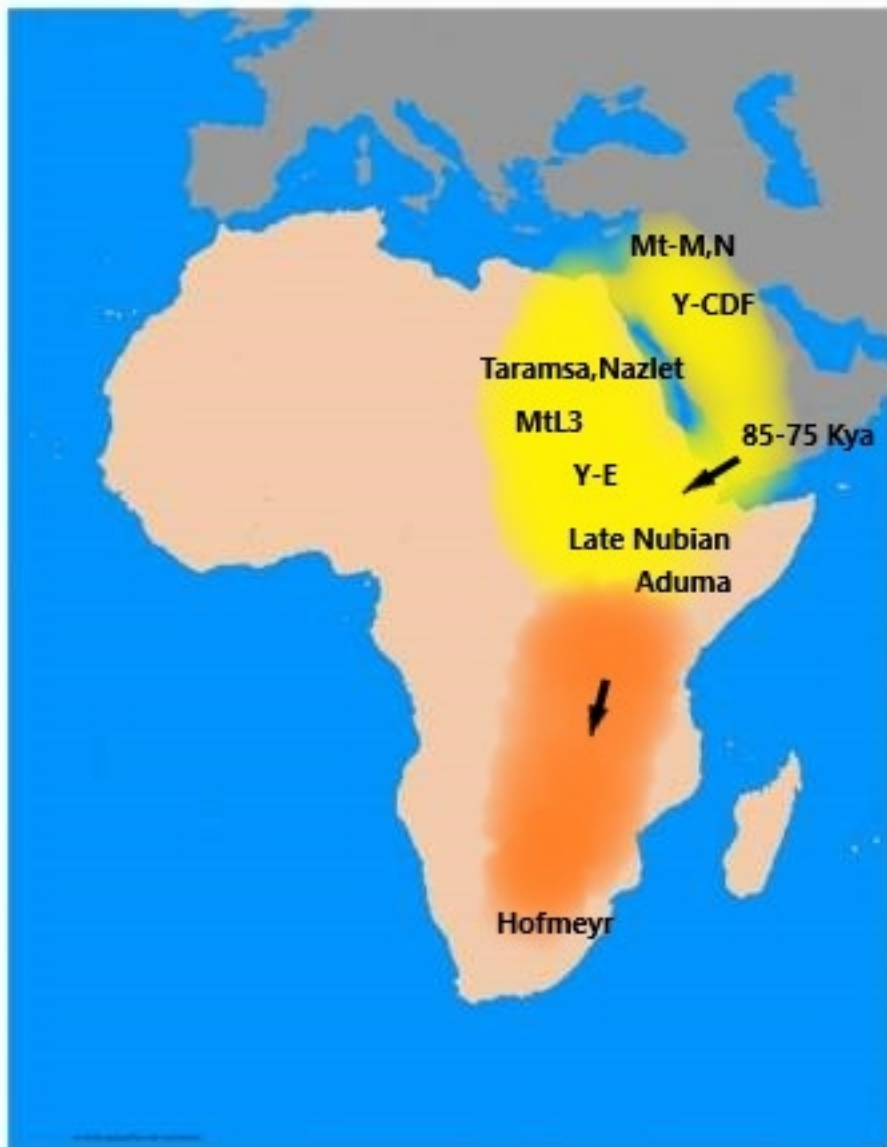

Figure 2
